1           Perceptions and responses to COVID-19 through wastewater surveillance  
2           information and online search behavior: A randomized controlled trial

3  
4           Michio Murakami <sup>1,\*</sup>, Shuhei Nomura <sup>2,3,4</sup>, Hiroki Ando <sup>5,6</sup>, and Masaaki Kitajima <sup>5</sup>

5  
6           <sup>1</sup> Center for Infectious Disease Education and Research, Osaka University, Suita, Osaka 565-0871,  
7           Japan

8           <sup>2</sup> Department of Health Policy and Management, School of Medicine, Keio University, Shinjuku,  
9           Tokyo 160-8582, Japan

10          <sup>3</sup> Department of Global Health Policy, Graduate School of Medicine, The University of Tokyo,  
11          Bunkyo, Tokyo 113-0033, Japan

12          <sup>4</sup> Tokyo Foundation for Policy Research, Tokyo 106-6234, Japan

13          <sup>5</sup> Division of Environmental Engineering, Faculty of Engineering, Hokkaido University, Sapporo,  
14          Hokkaido 060-8628, Japan

15          <sup>6</sup> Mel and Enid Zuckerman College of Public Health, University of Arizona, Tucson, Arizona 85724,  
16          United States

17  
18          \* Corresponding author: [michio@cider.osaka-u.ac.jp](mailto:michio@cider.osaka-u.ac.jp)

20 **Abstract**

21 Wastewater surveillance is anticipated to be a representative and timely method to assess infectious  
22 disease status; however, its influence on public perception and behavior remains unclear. Therefore,  
23 in this study, we used a randomized controlled trial to analyze the influence of wastewater  
24 surveillance-based information on understanding of, interest in, relief regarding, preventive  
25 behavioral intention against, and subsequent online search behavior related to coronavirus disease  
26 2019 (COVID-19). Valid responses were obtained from 1,000 individuals in both control and  
27 intervention groups from Yahoo crowdsourcing users aged  $\geq 18$  years in Japan. This survey was  
28 conducted from August 4 to August 7, 2023, just before the common Japanese tradition of returning  
29 to hometowns. The questionnaire not only collected personal attributes but also gauged responses to  
30 COVID-19 information. This information highlighted the early detection capabilities and  
31 representativeness of wastewater surveillance compared with sentinel surveillance at medical  
32 institutions. At one-week post-survey, we obtained the survey participants' online search history for  
33 key words such as "bullet train," "highway," "airplane," and "wastewater." The findings showed no  
34 significant differences between the two groups in terms of COVID-19 interest or preventive  
35 behavior before information provision, verifying the effectiveness of participant randomization.  
36 Wastewater surveillance-based information did not notably elevate understanding or specific  
37 intentions regarding COVID-19, such as wearing masks and receiving vaccination. However, it  
38 significantly increased interest in, relief concerning the infection status, and general preventive  
39 behavioral intentions. Heightened interest and general preventive intentions did not depend on prior

40 interest or behavior. However, those who previously engaged in preventive behavior or who were  
41 less interested in COVID-19 exhibited more relief after exposure to wastewater surveillance-based  
42 information. Furthermore, this information could slightly influence online searches related to return  
43 travel modes, such as highways. In conclusion, information from wastewater surveillance  
44 effectively shapes individual perceptions of and responses to infections.

45

46

## 47 **1. Introduction**

48 During an infectious disease outbreak, it is vital to monitor infection status over time, including  
49 tracking the daily number of infected individuals. Monitoring helps ensure adequate medical  
50 resources, such as hospital capacity (Emanuel et al., 2020). Furthermore, sharing information about  
51 the infection status can prompt the public to adopt preventive behavior (Morii et al., 2023). Since  
52 the onset of the coronavirus disease 2019 (COVID-19) pandemic, data on daily infections have  
53 been widely disseminated in many countries (Mathieu et al., 2020). However, as the severity of the  
54 COVID-19 pandemic has decreased, obtaining a comprehensive picture of the infection status has  
55 become challenging. Comprehensive or random sampling surveys can be costly, and some  
56 symptomatic individuals avoid seeking medical attention (Dean, 2022).

57 Measuring pathogenic microorganisms in the influent of wastewater treatment plants  
58 (referred to as wastewater surveillance) provides a representative view of infection in a particular  
59 area. Wastewater surveillance can be more economical and faster than clinical surveillance for

60 understanding the prevalence of infectious diseases in a community and can lead to earlier detection  
61 (Kitajima et al., 2020; Murakami et al., 2020). Research has shown that concentration of severe  
62 acute respiratory syndrome coronavirus 2 (SARS-CoV-2) in wastewater foreshadows the number of  
63 clinically confirmed cases in the corresponding population, enabling earlier outbreak alerts (Ando et  
64 al., 2023; Kagami et al., 2023; Peccia et al., 2020; Tiwari et al., 2022). Although surveillance of  
65 wastewater discharged from facilities has been used to encourage testing and preventive behavior  
66 against infection for residents of those facilities (Betancourt et al., 2021; Kitajima et al., 2022),  
67 information based on surveillance at wastewater treatment plants has also been used to understand  
68 trends in infection status, particularly among experts (Dean, 2022). In Japan, since the  
69 reclassification (i.e., downgrading) of COVID-19's legal status on May 8, 2023, infection have been  
70 tracked using weekly reports from selected sentinel medical institutions. This change has led to  
71 delays in understanding real-time infection status. Consequently, wastewater surveillance, which  
72 provides quicker insights (approximately 1–2 weeks earlier than sentinel surveillance), has gained  
73 prominence (Ando et al., 2023).

74 Current wastewater surveillance data are available on dedicated websites, such as those  
75 provided by the U.S. Centers for Disease Control and Prevention (Centers for Disease Control and  
76 Prevention, 2023) and the Netherlands' Coronavirus Dashboard (Coronavirus Dashboard, 2023). In  
77 Japan, some local governments also share wastewater surveillance data (City of Sapporo, 2023b;  
78 Komatsu City, 2023). Few studies have examined public attitudes toward wastewater surveillance,  
79 with most respondents appreciating its utility (Holm et al., 2022; LaJoie et al., 2022; Takagi et al.,

80 2023). However, the impact of this form of surveillance on the public interest in COVID-19 and its  
81 preventive behavior remain unclear.

82 Therefore, this study aimed to investigate how presenting wastewater surveillance data that  
83 reflected infection status influenced people's perceptions and behavior related to COVID-19. We  
84 compared the reactions to information from sentinel surveillance alone with those from a  
85 combination of wastewater and sentinel clinical surveillance data. Specifically, we conducted a  
86 questionnaire survey to gauge participants' understanding of, interest in, relief regarding, and intent  
87 to adopt preventive behavior after presenting the wastewater surveillance data. Additionally, we  
88 analyzed the participants' online search behavior one-week post-survey, considering that people's  
89 stated intentions may not always match their actions. We believe that their online search behavior  
90 could reflect the shifts promoted by wastewater data.

91

## 92 **2. Methods**

### 93 **2.1. Ethics**

94 This study was approved by the Ethics Committee of the Center for Infectious Disease Education  
95 and Research at Osaka University (approval number 2023CRER0612). All participants provided  
96 informed consent.

97

### 98 **2.2. Surveys**

99 This study was designed as a randomized controlled trial. Participants were randomly selected and

100 divided into control (n = 10,000) and intervention (n = 10,000) groups out of approximately 50,000  
101 active users of Yahoo's crowdsourcing service (Yahoo! crowdsourcing) as of July 2023. These users  
102 were part of a larger pool of approximately one million registered users, all of whom were aged  $\geq 15$   
103 years in Japan. An online survey was targeted for those aged  $\geq 18$  years and conducted for both  
104 groups between August 4 and August 7, 2023 until 1,000 valid responses were collected from each  
105 group.

106 The primary goal of this study was to understand the influence of providing information on  
107 wastewater surveillance, which reflected the infection status on individuals' perceptions of and  
108 responses to COVID-19. The sample size was determined in consultation with Yahoo! JAPAN  
109 based on survey feasibility and a lack of prior knowledge regarding the potential impact of such  
110 information. With a population size of 125,000,000 in Japan, a sample size of approximately 400 is  
111 needed to achieve a 5% margin of error with a 95% confidence interval (Serdar et al., 2021). The  
112 sample size of this study surpassed that benchmark.

113 The questionnaires and information presented in the survey were written in Japanese. For  
114 both the control and intervention groups, data from more than 40% of the targeted participants were  
115 collected on August 4, and by August 5, the rate had exceeded 80% (Figure S1). Our survey  
116 coincided with the custom period in Japan when many people returned to their hometowns in mid-  
117 August. Many people took vacation days between August 11 (a national holiday) and 16. The  
118 participants assessed the infection status information using the URL provided (Figure 1). Those  
119 who answered "I did not read the content carefully" were excluded (27 in the control group and 36

120 in the intervention group). Participants who provided valid responses received a reward equivalent  
121 to 100 Japanese Yen.

122 The questionnaire comprised four major sections. Two authors [MM (specializing in risk  
123 science and environmental engineering) and SN (focusing on epidemiology and public health)]  
124 with expertise in risk perception and preventive behavior regarding COVID-19 (Adachi et al., 2022;  
125 Uchibori et al., 2022) were consulted to frame the questionnaire in the context of the COVID-19  
126 pandemic. In the first section, prior to introducing any information on the infection status (covered  
127 in the second section), the participants rated their interest in COVID-19, changes in case numbers,  
128 their overall preventive behavior, mask usage, and attitudes toward vaccination using a five-point  
129 Likert scale (1 = strongly disagree to 5 = strongly agree). These evaluations were later labeled as  
130 “interest in COVID-19 (pre),” “interest in infection status (pre),” “overall preventive behavior (pre),”  
131 “mask-wearing (pre),” “awareness of the importance of COVID-19 vaccine (pre).”

132 Participants were then given different sets of information in the second section, depending  
133 on whether they were in the control or intervention group (Figure 1). The control group received the  
134 latest data on the numbers of reported cases from all of Japan and Sapporo (City of Sapporo, 2023a),  
135 including specific details from the two periods in July 2023 [July 17 to July 23, 2023 (Period 1),  
136 and July 24 to July 30 (Period 2)], along with a comparison of these periods. This information was  
137 shown both narratively and tabularly. Moreover, the number of daily reported cases from June 1,  
138 2020 to May 7, 2023 in both Japan and Sapporo was represented by a figure.

139 The intervention group received information on wastewater surveillance in Sapporo, in

140 addition to the number of cases described above. The wastewater surveillance estimated the number  
141 of cases in Sapporo for five days after sample collection based only on the SARS-CoV-2  
142 concentration in wastewater (Ando et al., 2023). In addition to the data for Periods 1 and 2, the  
143 estimated figures from August 3 to August 7 (Period 3) and its ratio compared with Period 2 were  
144 also provided tabularly with a key message. The wastewater surveillance data estimated the total  
145 number of infected individuals in Sapporo from June 2020 to August 7, 2023, which was  
146 represented by a figure. This estimate was compared to the total confirmed cases from a notifiable  
147 clinical surveillance conducted throughout Japan and Sapporo until the downgrading of the legal  
148 status of COVID-19 (May 8, 2023), showing good agreement between the estimated and clinically  
149 confirmed cases in Sapporo.

150 Sapporo was chosen because of its capability to present estimates of the number of infected  
151 individuals (Ando et al., 2023) and because of their local government's weekly updates on COVID-  
152 19 information based on wastewater surveillance on its website (City of Sapporo, 2023b).

153 In the third section, following the presentation of COVID-19 information in the second  
154 section and ensuring that the participant had read the content (which was confirmed with a "I read  
155 the content carefully" or "I did not read the content carefully"), respondents were prompted to  
156 indicate their understanding of, interest in, and relief regarding the COVID-19 infection status.  
157 They also provided their intentions for overall preventive behavior, mask-wearing, and vaccination  
158 as control measures using a five-point Likert scale (1 = strongly disagree to 5 = strongly agree).  
159 These evaluations were subsequently labeled as "understanding of infection status (post)," "interest



160 in infection status (post),” “relief regarding infection status (post),” “intent to engage in overall  
161 preventive behavior (post),” “intent to wear masks (post),” and “intent to receive COVID-19  
162 vaccine (post).” In the fourth section, the participants responded to questions about their gender, age,  
163 place of residence (at the prefecture level), and history of COVID-19. There were no missing data  
164 for any of the survey items.

165           Next, we obtained population-based data on online search behavior from Yahoo! JAPAN.  
166 These data captured participants’ Yahoo! JAPAN search engine usage within one week before and  
167 after the online survey for both the control and intervention groups. Specifically, we first obtained  
168 information regarding the top 100 and bottom 100 keywords with the most significant search  
169 differences between the two groups post-survey. Based on this information, we established the  
170 following five lists of search keywords (terms in the keyword lists are indicated by double quotation  
171 marks):

172 (1) “bullet train” [*jr Hokkaido* or *jr East Japan* or *jr Tokai* or *jr West Japan* or *jr Shikoku* or *jr*  
173 *Kyushu* or *Shinkansen* (bullet train)]

174 (2) “highway” [*kousokudouro* (highway)]

175 (3) “airplane” [*ana* or *jal* or *Zennihonkuuyu* (All Nippon Airways) or *Zennikuu* (an abbreviation of  
176 All Nippon Airways) or *Koukuu* (an abbreviation of Japan Airlines) or *hikouki* (airplane) or *kuukou*  
177 (airport)]

178 (4) “COVID-19” [*korona* (corona) or *covid*]

179 (5) “wastewater” [*gesui* (wastewater)].

180 Lists (1) and (3) represent bullet trains with their respective operators and airplane-related  
181 terms, including major Japanese airlines, respectively.

182 Considering the decreased travel in Japan during 2020 and 2021 because of the COVID-19  
183 pandemic (Cabinet Office: Shogo Maeda, 2022), anticipating increased travel by mid-August 2023,  
184 after the downgrading of COVID-19's legal status, we decided to use keyword lists (1) to (3).  
185 Keywords were extracted even when flanked by other characters [e.g., *koronairusu* (i.e.,  
186 coronavirus)] and were recognized irrespective of half-width or full-width characters, or case  
187 distinction.

188 Data regarding the search numbers within a week before and after the survey were obtained  
189 for both groups. If the search count was five or less, the exact number was withheld. Additionally,  
190 we acquired data on the ratio of the total Yahoo searchers in the week before and after the survey.  
191 The post-survey Yahoo user count was 1.0050 times greater than that in the pre-survey.

192

### 193 **2.3. Statistical analysis**

194 First, to ensure that the random assignment of the participants was done properly, we performed Z-  
195 pooled exact unconditional, chi-square, Fisher-Freeman-Halton, or Mann-Whitney's U tests to  
196 investigate differences in "interest in COVID-19 (pre)," "interest in infection status (pre)," "overall  
197 preventive behavior (pre)," "mask-wearing (pre)," "awareness of the importance of COVID-19  
198 vaccine (pre)," gender, age, prefecture of residence [Hokkaido (prefecture where Sapporo is  
199 located) or other prefectures], and history of COVID-19 infection between the control and

200 intervention groups.

201           Next, we calculated Spearman’s correlation coefficients for the control and intervention  
202 groups among “understanding of infection status (post),” “interest in infection status (post),” “relief  
203 regarding infection status (post),” “intent to engage in overall preventive behavior (post),” “intent to  
204 wear masks (post),” and “intent to receive COVID-19 vaccine (post).” We then used Mann-  
205 Whitney’s U test to assess differences in “understanding of infection status (post),” “interest in  
206 infection status (post),” “relief regarding infection status (post),” “intent to engage in overall  
207 preventive behavior (post),” “intent to wear masks (post),” and “intent to receive COVID-19  
208 vaccine (post)” between the control and intervention groups. Furthermore, to examine how  
209 participants’ psychological factors had additional effect of the intervention on the outcomes, we  
210 performed ordinal logistic regression analyses for “interest in infection status (post),” “relief  
211 regarding infection status (post),” and “intent to engage in overall preventive behavior (post)” that  
212 showed the significant differences in the Mann-Whitney’s U test above. The intervention, “interest  
213 in COVID-19 (pre),” “overall preventive behavior (pre),” and their interaction terms with the  
214 intervention were used as explanatory variables. “Interest in COVID-19 (pre)” and “overall  
215 preventive behavior (pre)” were centered. The variance inflation factor was 1.00 for the intervention  
216 and 3.06–3.43 for the other variables, indicating that multicollinearity was sufficiently small.

217           Finally, we compared the proportion of searchers for each keyword list between the control  
218 and intervention groups in the week before and after responding to the questionnaire survey. For  
219 this purpose, we used a Z-pooled exact unconditional test. This test was chosen because its

220 appropriateness in evaluating associations in two  $\times$  two tables, especially when dealing with a low  
221 number of searchers (Mehrotra et al., 2003). Analyses were conducted using IBM SPSS 28 (IBM,  
222 Chicago, IL, USA) or R (Calhoun, 2022; R Development Core Team, 2021).

223

### 224 **3. Results**

225 Table 1 shows the differences in the characteristics of participants in the control and intervention  
226 groups before the presentation of information on infection status. There were no significant  
227 differences ( $P > 0.05$ ) in individual attributes such as gender, age, prefecture of residence, history of  
228 COVID-19, or in interest in and preventive behavior regarding COVID-19 before the presentation  
229 of information.

230         There was no significant association between relief regarding infection status and interest  
231 in or intention for preventive behavior in either the control or intervention groups after the  
232 information presentation, except for the association between relief regarding infection status (post)  
233 and intent to receive COVID-19 vaccine (post) in the intervention group (Table S1;  $P > 0.05$ ). By  
234 contrast, significant associations were observed between interest in and intention for preventive  
235 behavior ( $P < 0.05$ ). For example, the Spearman's correlation coefficient between interest in  
236 infection status (post) and intent to engage in overall preventive behavior (post) in the intervention  
237 group was 0.639 ( $P < 0.001$ ).

238         Table 2 shows differences in understanding of, interest in, relief regarding, and intention  
239 for preventive behavior regarding COVID-19 between the two groups after information

240 presentation. Interest in infection status (post), relief regarding infection status (post), and intent to  
241 engage in overall preventive behavior (post) in the intervention group were significantly higher than  
242 those in the control group ( $P < 0.05$ ;  $r = 0.045$ – $0.048$ ). No significant differences were found in  
243 understanding of infection status (post), intent to wear masks (post), and intent to receive COVID-  
244 19 vaccine (post) ( $P > 0.05$ ).

245 Table 3 shows the associations of interest in COVID-19 (pre), overall preventive behavior  
246 (pre), intervention, and their interaction terms with interest in infection status (post), relief regarding  
247 infection status (post), and intent to engage in overall preventive behavior (post). All outcomes were  
248 significantly and positively associated with the intervention ( $P < 0.05$ ). Interest in COVID-19 (pre)  
249 and overall preventive behavior (pre) were significantly and positively associated with interest in  
250 infection status (post) and intent to engage in overall preventive behavior (post) ( $P < 0.05$ ), whereas  
251 their interaction terms with intervention were not significantly associated with these two outcomes  
252 ( $P > 0.05$ ). In contrast, overall preventive behavior (pre) and the interaction term with intervention  
253 were significantly negatively and positively associated with relief regarding infection status (post),  
254 respectively ( $P < 0.05$ ). Interest in COVID-19 (pre) was not significantly associated with relief  
255 regarding infection status (post) ( $P > 0.05$ ), but its interaction term with intervention showed a  
256 significant negative association ( $P < 0.05$ ).

257 Table 4 shows the proportion of participants who engaged in search behavior after the  
258 survey was administered. The proportion of participants who searched for “bullet train” was  
259 marginally higher in the intervention group than in the control group, although the difference was

260 not significant ( $P = 0.129$ ;  $\phi = 0034$ ). When substituting the number three for “highway” (i.e., 1/2  
261 of the upper limit rounded to the nearest integer) in the control group, the intervention group had a  
262 significantly higher proportion of searchers ( $P < 0.05$ ;  $\phi = 0048$ ). However, using the upper limit of  
263 five, the difference was not significant ( $P = 0.146$ ;  $\phi = 0034$ ). The proportions of participants who  
264 searched for “airplane” and “COVID-19” were similar between the two groups ( $P > 0.05$ ). The  
265 number of participants who searched for “wastewater” was  $\leq 5$  for each group.

266 Table S2 shows the proportion of participants who searched for keyword lists during the  
267 week before the survey. There was no significant difference in the proportion of participants who  
268 searched for any of the keyword lists between the two groups ( $P > 0.05$ ).

269

#### 270 **4. Discussion**

271 Using a randomized controlled trial design, this study investigated whether the presentation of  
272 information on COVID-19 infection status based on wastewater surveillance increased interest in,  
273 relief regarding, and intention for preventive behavior against COVID-19. We also analyzed  
274 changes in online search behavior after the provision of the aforementioned information.

275 The participants in this study did not differ in gender, age, place of residence, history of  
276 COVID-19 infection, and interest in and preventive behavior against COVID-19 prior to  
277 information presentation. Similarly, the proportion of participants who searched for each keyword  
278 list prior to the survey was consistent between the control and intervention groups. This confirmed  
279 that the randomization assignment of the participants was executed well based on the observed

280 variables.

281           Next, the presentation of information on infection status based on wastewater surveillance  
282 increased interest in, relief regarding, and intention for overall preventive behavior against COVID-  
283 19. This finding underscores the utility of such information. Furthermore, this information  
284 presentation may have caused a slight uptick in search behavior related to highways as a mode of  
285 transportation. However, the difference between the control and intervention groups was not clearly  
286 specified, because the number of participants who searched was below the upper limit in the control  
287 group. In addition, although not significant, there was a trend toward more searches related to bullet  
288 trains in the intervention group. Such spikes in search behavior may imply an increase in return  
289 travel during the mid-August vacation season.

290           Traffic volume on highways from August 9 to August 16, 2023 (approximately one week  
291 post-survey) was 1.07 times that in 2022 (NEXCO EASTTOP, 2023). On August 10, 2023,  
292 potential nationwide cancellations of bullet trains owing to Typhoon No. 7, including JR Tokai  
293 bullet trains connecting major cities, were announced. Subsequently, there were cancellations and  
294 delays between August 15 and 17, 2023. The passenger count on the JR Tokai bullet train from  
295 August 10 to August 17 was 1.25 times that in 2022 (JR Central Japan Railway Company (JR  
296 Toukai), 2023). Therefore, after the survey, it is likely that participants who planned to return or  
297 travel during the mid-August vacation season began searching for highway and bullet train-related  
298 terms. The wastewater surveillance data presentation might have nudged people toward pre-  
299 COVID-19 routine behavior, such as using highways or bullet trains for travel, along with a rise in

300 interest in, relief regarding, or intention for preventive behavior against COVID-19.

301           It is challenging to interpret why wastewater surveillance-based information intensified  
302 interest in, relief regarding, and intention toward overall COVID-19 preventive behavior, and why  
303 there was a spike in search behavior related to highways. One of the assumptions underlying the  
304 utility of presenting wastewater surveillance-based information is that people generally have a  
305 favorable perception of the wastewater surveillance approach (Holm et al., 2022; LaJoie et al.,  
306 2022; Takagi et al., 2023).

307           This study also indicated that significant associations existed between interest in and  
308 intention for overall preventive behavior post-presentation. However, no significant associations  
309 were observed between relief regarding and either interest in or intention for overall preventive  
310 behavior. Results from the ordinal logistic regression analysis showed varied associations with  
311 explanatory variables between relief and the interest or intention post-presentation. The association  
312 between interest and intention aligns well with the finding in a previous study (Yamagata et al.,  
313 2023). The present study suggests that participants who experienced increased interest and intention  
314 toward overall preventive measures for COVID-19 owing to the presentation of wastewater  
315 surveillance information differed in characteristics from those who felt an enhanced sense of relief  
316 regarding the infection status.

317           Interest in infection status (post) or intent to engage in overall preventive behavior (post)  
318 was significantly and positively associated with interest in COVID-19 (pre) and overall preventive  
319 behavior (pre) but not with the interaction items with intervention. This means that although



320 participants who had previously shown more interest in COVID-19 and engaged in preventive  
321 behavior were more interested in the infection status or intended to engage in overall preventive  
322 behavior post-survey, the presentation of wastewater surveillance-based information had no  
323 additional effect on these outcomes.

324 In contrast, relief regarding infection status (post) was negatively associated with overall  
325 preventive behavior (pre) and the interaction term between intervention and interest in COVID-19  
326 (pre). It was also positively associated with the interaction term between the intervention and  
327 overall preventive behavior (pre). This suggests that those who had engaged in preventive behavior  
328 against COVID-19 were more likely to be concerned about its infection status even after receiving  
329 information on the infection status, but the wastewater surveillance data increased their sense of  
330 relief. In addition, individuals who were less interested in COVID-19 felt more relief when they  
331 received wastewater surveillance information.

332 The data from wastewater surveillance highlighted in this study provided two primary  
333 advantages: first, it allows for early detection as wastewater surveillance information captures more  
334 recent infection status compared to clinical surveillance data; second, it ensures representativeness  
335 by enabling comparisons with infection status derived from a comprehensive survey conducted until  
336 the downgrading of the legal status of COVID-19 (Kitajima et al., 2020; Murakami et al., 2020).

337 The infection status highlighted by the wastewater surveillance data in this study was  
338 nearly at its peak; however, it showed no significant fluctuations in the count of infections over the  
339 previous 2–3 weeks. This stability may have offered some individuals, particularly those who were

340 less interested in COVID-19, a heightened sense of relief. Their relief may have stemmed from the  
341 perceived absence of worsening conditions, validating their indifference. Alternatively, knowledge  
342 of this novel surveillance method may have provided comfort. Using wastewater for infection  
343 tracking is a new approach, but its public awareness remains limited (Holm et al., 2022). Those  
344 practicing COVID-19 preventive measures may find reassurance from these data, viewing it as an  
345 additional resource for informing their actions.

346         This study has some limitations. First, although we confirmed that there were no  
347 significant differences in individual attributes, such as gender and age, and psychological factors  
348 between the control and intervention groups prior to presenting the information, we were unable to  
349 verify differences in economic status and occupation. Second, because the participants were  
350 exclusively registered active Yahoo crowdsourcing users, caution is necessary when generalizing  
351 the findings. Third, the impact of presenting wastewater surveillance information may vary  
352 depending on the infection status. Our study focused on a scenario in which the infection numbers  
353 were at their peak, but there were not significant fluctuations in the previous 2–3 weeks. Hence,  
354 longitudinal monitoring of the perceptions and behavior of individuals exposed to this information  
355 is essential to understand the impact of different infection statuses. Fourth, regarding the online  
356 search of the keyword list, we could not determine the actual intent of the participants. Furthermore,  
357 some extracted searches might not have aligned with the study’s intended focus because keywords  
358 were included even if they contained characters before or after the targeted keywords. We assumed  
359 that the increase in the number of participants who conducted online searches was associated with

360 keywords such as “highways” or “bullet trains.” Future studies should combine online search  
361 analyses with behavioral observations. Fifth, the effects of this study, which focused on infection  
362 status information derived from wastewater surveillance, showed only a minimal impact on  
363 preventive behavior and increased search behavior related to highways. Further research is required  
364 to develop more impactful information presentation methods.

365

## 366 **5. Conclusions**

367 Using a randomized controlled trial design, this study investigated the perceptions and intentions  
368 regarding preventive behavior related to COVID-19 by presenting infection status information from  
369 wastewater surveillance. Furthermore, we analyzed the behavioral changes brought about by this  
370 information using online search patterns. This is the first study to reveal the effects of wastewater  
371 surveillance information on the perceptions of and responses to COVID-19. The main findings of  
372 this study are as follows:

- 373 ● Presentation information on infection status via wastewater surveillance increased the interest  
374 in, relief regarding, and intention for overall preventive behavior regarding COVID-19.  
375 However, there was no increase in the understanding of the infection status and intention to  
376 wear masks and receive the COVID-19 vaccination.
- 377 ● The characteristics of the participants, where the presentation of wastewater surveillance  
378 information triggered a further rise in interest or intention for overall preventive behavior  
379 regarding COVID-19, varied from those feeling an enhanced sense of relief regarding the

380 infection status. The additional effect of presenting information on interest or intention for  
381 overall preventive behavior was unaffected by prior interest in COVID-19 or overall preventive  
382 behavior. In contrast, a heightened sense of relief was more prominent among those who  
383 already practiced COVID-19 preventive behavior or those who were less interested in COVID-  
384 19.

- 385 ● The presentation of wastewater surveillance information may have led to a slight uptick in  
386 online searches, such as for highways pertinent to homecoming during the mid-August  
387 vacation season, suggesting a possible resumption of habits from the pre-COVID-19 times.
- 388 ● The utility of presenting wastewater surveillance information was demonstrated through  
389 observations of changes in people's perceptions of and response to infections.

390

### 391 **Declaration of Competing Interest**

392 Michio Murakami reports a relationship with NJS CO., LTD. that includes: consulting or advisory.

393 Masaaki Kitajima reports a relationship with Shionogi & Co., Ltd. that includes: funding grants.

394 Masaaki Kitajima reports a relationship with AdvanSentinel, Inc. that includes: funding grants.

395 Masaaki Kitajima has patent pending to Shionogi & Co., Ltd. Other authors declared no competing  
396 interest.

397

### 398 **Author contributions**

399 MM: Conceptualization, Methodology, Formal analysis, Investigation, Visualization, Funding

400 acquisition, Writing – original draft.

401 SN: Conceptualization, Methodology, Funding acquisition, Writing – review & editing.

402 HA: Resources, Writing – review & editing.

403 MK: Resources, Funding acquisition, Writing – review & editing.

404

#### 405 **Data availability**

406 We have included all the results produced in the present work in the manuscript. Note that the raw  
407 data used in the study were provided by Yahoo! JAPAN, as described in this paper. We are unable to  
408 attach all the raw data for each participant in this paper due to the contract and ethical restrictions.

409

#### 410 **Acknowledgements**

411 We would like to thank Editage ([www.editage.com](http://www.editage.com)) for English language editing and Yahoo!  
412 JAPAN for the survey. We are also grateful for helps: Ms. Aya Nishida (Osaka University).

413

#### 414 **Funding**

415 This work was supported by “The Nippon Foundation - Osaka University Project for Infectious  
416 Disease Prevention,” a grant PRESTO [JPMJPR22R8] from the Japan Science and Technology  
417 Agency, and the Japan Agency for Medical Research and Development (AMED) under grant  
418 number JP22fk0108508. The funders had no role in study design, data collection and analysis,  
419 decision to publish, or preparation of the manuscript.

420

## 421 **Statements**

422 During the preparation of this manuscript, the authors used DeepL solely for the purpose of the  
423 possible improvement of English language expression. The authors created the original texts before  
424 using this tool. The authors reviewed and edited the content as needed, after using this tool.  
425 Furthermore, the paper was carefully edited by native professional editors. The authors take full  
426 responsibility for the content of the publication.

427

## 428 **References**

429 Adachi, M., Murakami, M., Yoneoka, D., Kawashima, T., Hashizume, M., Sakamoto, H., Eguchi, A.,  
430 Ghaznavi, C., Gilmour, S., Kaneko, S., Kunishima, H., Maruyama-Sakurai, K., Tanoue, Y.,  
431 Yamamoto, Y., Miyata, H. Nomura, S. 2022. Factors associated with the risk perception of  
432 COVID-19 infection and severe illness: A cross-sectional study in Japan. *SSM Popul. Health*  
433 18, 101105.

434 Ando, H., Murakami, M., Ahmed, W., Iwamoto, R., Okabe, S. Kitajima, M. 2023. Wastewater-  
435 based prediction of COVID-19 cases using a highly sensitive SARS-CoV-2 RNA detection  
436 method combined with mathematical modeling. *Environ. Int.*, 107743.

437 Betancourt, W.Q., Schmitz, B.W., Innes, G.K., Prasek, S.M., Pogreba Brown, K.M., Stark, E.R.,  
438 Foster, A.R., Sprissler, R.S., Harris, D.T., Sherchan, S.P., Gerba, C.P. Pepper, I.L. 2021.  
439 COVID-19 containment on a college campus via wastewater-based epidemiology, targeted

- 440 clinical testing and an intervention. *Sci. Total Environ.* 779.
- 441 Cabinet Office: Shogo Maeda 2022. Changes in travel consumption demand since the infection  
442 spread: Attempt to estimate travel consumption to the footfall using travel-related indicators.  
443 [https://www5.cao.go.jp/keizai3/monthly\\_topics/2022/0428/topics\\_067.pdf](https://www5.cao.go.jp/keizai3/monthly_topics/2022/0428/topics_067.pdf). Accessed on  
444 September 1, 2023. (in Japanese)
- 445 Calhoun, P. 2022. Package ‘Exact’. <https://cran.r-project.org/web/packages/Exact/Exact.pdf>.  
446 Accessed on September 1, 2023.
- 447 Centers for Disease Control and Prevention 2023. COVID data tracker. [https://covid.cdc.gov/covid-  
448 data-tracker/#wastewater-surveillance](https://covid.cdc.gov/covid-<br/>448 data-tracker/#wastewater-surveillance). Accessed on September 1, 2023.
- 449 City of Sapporo 2023a. Outbreak of COVID-19 in the city (after changing to class 5).  
450 [https://www.city.sapporo.jp/2019n-cov/5ruika\\_hasseijoukyou.html](https://www.city.sapporo.jp/2019n-cov/5ruika_hasseijoukyou.html). Accessed on September 1,  
451 2023. (in Japanese)
- 452 City of Sapporo 2023b. Wastewater surveillance.  
453 <https://www.city.sapporo.jp/gesui/surveillance.html>. Accessed on September 1, 2023. (in  
454 Japanese)
- 455 Coronavirus Dashboard 2023. Virus particles in wastewater.  
456 <https://coronadashboard.government.nl/landelijk/rioolwater>. Accessed on September 1, 2023.
- 457 Dean, N. 2022. Tracking COVID-19 infections: time for change. *Nature* 602, 185.
- 458 Emanuel, E.J., Persad, G., Upshur, R., Thome, B., Parker, M., Glickman, A., Zhang, C., Boyle, C.,  
459 Smith, M. Phillips, J.P. 2020. Fair allocation of scarce medical resources in the time of covid-

- 460 19. *N. Eng. J. Med.* 382, 2049-2055.
- 461 Holm, R.H., Brick, J.M., Amraotkar, A.R., Hart, J.L., Mukherjee, A., Zeigler, J., Bushau-Sprinkle,  
462 A.M., Anderson, L.B., Walker, K.L., Talley, D., Keith, R.J., Rai, S.N., Palmer, K.E., Bhatnagar,  
463 A. Smith, T. 2022. Public awareness of and support for the use of wastewater for SARS-CoV-2  
464 monitoring: A community survey in Louisville, Kentucky. *ACS ES and T Water* 2, 1891-1898.
- 465 JR Central Japan Railway Company (JR Toukai) 2023. Usage in mid-August for Fiscal Year 2023:  
466 Determination of transportation volume. [https://jr-](https://jr-central.co.jp/news/release/_pdf/000042913.pdf)  
467 [central.co.jp/news/release/\\_pdf/000042913.pdf](https://jr-central.co.jp/news/release/_pdf/000042913.pdf). Accessed on September 1, 2023. (in Japanese)
- 468 Kagami, K., Kitajima, M., Takahashi, H., Teshima, T. Ishiguro, N. 2023. Association of wastewater  
469 SARS-CoV-2 load with confirmed COVID-19 cases at a university hospital in Sapporo, Japan  
470 during the period from February 2021 to February 2023. *Sci. Total Environ.* 899.
- 471 Kitajima, M., Ahmed, W., Bibby, K., Carducci, A., Gerba, C.P., Hamilton, K.A., Haramoto, E. Rose,  
472 J.B. 2020. SARS-CoV-2 in wastewater: State of the knowledge and research needs. *Sci. Total*  
473 *Environ.* 739.
- 474 Kitajima, M., Murakami, M., Kadoya, S.S., Ando, H., Kuroita, T., Katayama, H. Imoto, S. 2022.  
475 Association of SARS-CoV-2 load in wastewater with reported COVID-19 cases in the Tokyo  
476 2020 Olympic and Paralympic Village from July to September 2021. *JAMA Netw. Open* 5,  
477 e2226822.
- 478 Komatsu City 2023. Wastewater monitoring.  
479 [https://www.city.komatsu.lg.jp/kurasi\\_tetuzuki/13/1/14602.html](https://www.city.komatsu.lg.jp/kurasi_tetuzuki/13/1/14602.html). Accessed on September 1,



480 2023. (in Japanese)

481 LaJoie, A.S., Holm, R.H., Anderson, L.B., Ness, H.D. Smith, T. 2022. Nationwide public  
482 perceptions regarding the acceptance of using wastewater for community health monitoring in  
483 the United States. PLOS ONE 17, e0275075.

484 Mathieu, E., Ritchie, H., Rodés-Guirao, L., Appel, C., Giattino, C., Hasell, J., Macdonald, B.,  
485 Dattani, S., Beltekian, D., Ortiz-Ospina, E. Roser, M. 2020. "Coronavirus pandemic (COVID-  
486 19)" published online at OurWorldInData.org. <https://ourworldindata.org/coronavirus>. Accessed  
487 on February 24, 2023.

488 Mehrotra, D.V., Chan, I.S.F. Berger, R.L. 2003. A cautionary note on exact unconditional inference  
489 for a difference between two independent binomial proportions. Biometrics 59, 441-450.

490 Morii, D., Miura, A. Komori, M. 2023. The impact of television on-air time on hand hygiene  
491 compliance behaviors during COVID-19 outbreak. Am. J. Infect. Control, doi:  
492 10.1016/j.ajic.2023.1003.1001.

493 Murakami, M., Hata, A., Honda, R. Watanabe, T. 2020. Letter to the editor: Wastewater-based  
494 epidemiology can overcome representativeness and stigma issues related to COVID-19.  
495 Environ. Sci. Technol. 54, 5311.

496 NEXCO EASTTOP 2023. Highway traffic conditions during mid-August (preliminary report  
497 [nationwide version]). [https://www.e-](https://www.e-nexco.co.jp/pressroom/cms_assets/pressroom/2023/08/17b/pdf.pdf)  
498 [nexco.co.jp/pressroom/cms\\_assets/pressroom/2023/08/17b/pdf.pdf](https://www.e-nexco.co.jp/pressroom/cms_assets/pressroom/2023/08/17b/pdf.pdf). Accessed on September 1,  
499 2023. (in Japanese)

500 Peccia, J., Zulli, A., Brackney, D.E., Grubaugh, N.D., Kaplan, E.H., Casanovas-Massana, A., Ko,  
501 A.I., Malik, A.A., Wang, D., Wang, M., Warren, J.L., Weinberger, D.M., Arnold, W. Omer, S.B.  
502 2020. Measurement of SARS-CoV-2 RNA in wastewater tracks community infection dynamics.  
503 Nature Biotechnology 38, 1164-1167.

504 R Development Core Team 2021. R 4.2.0. R: A language and environment for statistical computing.  
505 R Foundation for Statistical Computing, Vienna, Austria.

506 Serdar, C.C., Cihan, M., Yücel, D. Serdar, M.A. 2021. Sample size, power and effect size revisited:  
507 simplified and practical approaches in pre-clinical, clinical and laboratory studies. Biochem.  
508 Med. (Zagreb) 31, 010502.

509 Takagi, A., Takeda, M. Konno, S. 2023. Social acceptance of emerging technologies for combating  
510 COVID-19. Jpn. J. Risk. Anal. 32, 143-153. (in Japanese)

511 Tiwari, A., Lipponen, A., Hokajärvi, A.-M., Luomala, O., Sarekoski, A., Rytönen, A., Österlund, P.,  
512 Al-Hello, H., Juutinen, A., Miettinen, I.T., Savolainen-Kopra, C. Pitkänen, T. 2022. Detection  
513 and quantification of SARS-CoV-2 RNA in wastewater influent in relation to reported COVID-  
514 19 incidence in Finland. Water Res. 215, 118220.

515 Uchibori, M., Ghaznavi, C., Murakami, M., Eguchi, A., Kunishima, H., Kaneko, S., Maruyama-  
516 Sakurai, K., Miyata, H. Nomura, S. 2022. Preventive behaviors and information sources during  
517 COVID-19 pandemic: a cross-sectional study in Japan. Int. J. Environ. Res. Pub. He. 19, 14511.

518 Yamagata, M., Teraguchi, T. Miura, A. 2023. Effects of pathogen-avoidance tendency on infection-  
519 prevention behaviors and exclusionary attitudes toward foreigners: a longitudinal study of the

520 COVID-19 outbreak in Japan. *Jpn. Psychol. Res.* 65, 158-172.

521

A)

**Key messages:**  
 The current status of patients with COVID-19 is as follows: As an example, the infection rate in Sapporo is shown, along with that in the whole of Japan.

Compared to July 17 to July 23, 2023 (Period 1), the number of infected individuals from July 24 to July 30 (Period 2) was 1.14 times higher in the whole of Japan (sentinel surveillance) and 1.03 times higher in Sapporo (sentinel surveillance).

Table. Number of infected cases in whole of Japan and Sapporo (sentinel surveillance).

|                                                                                                                            | July 17 to July 23, 2023 (Period 1) | July 24 to July 30 (Period 2)                      |
|----------------------------------------------------------------------------------------------------------------------------|-------------------------------------|----------------------------------------------------|
| Number of infected cases in parts of Japan (sentinel surveillance) [number of patients per sentinel medical institution]   | 13.91 persons                       | 15.91 persons (comparison to Period 1: 1.14 times) |
| Number of infected cases in parts of Sapporo (sentinel surveillance) [number of patients per sentinel medical institution] | 10.09 persons                       | 10.36 persons (comparison to Period 1: 1.03 times) |

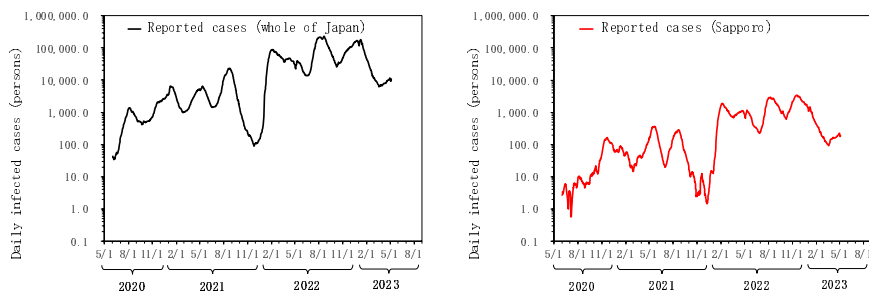

Figure. Trends in the infected cases (Left: whole of Japan; Right: Sapporo).

B)

**Key messages:**  
 The current status of patients with COVID-19 is as follows: As an example, the infection rate in Sapporo is shown, along with that in the whole of Japan.

Compared to July 17 to July 23, 2023 (Period 1), the number of infected individuals from July 24 to July 30 (Period 2) was 1.14 times higher in the whole of Japan (sentinel surveillance), 1.03 times higher in Sapporo (sentinel surveillance), and 0.86 times higher in Sapporo (wastewater surveillance). Compared to July 24 to July 30 (Period 2), the number of infected patients from August 3 to August 7 (Period 3) was 1.16 times higher in Sapporo (wastewater surveillance).

Table. Number of infected cases in whole of Japan and Sapporo (sentinel and wastewater surveillance).

|                                                                                                                            | July 17 to July 23, 2023 (Period 1) | July 24 to July 30 (Period 2)                             | August 3 to August 7 (Period 3)                           |
|----------------------------------------------------------------------------------------------------------------------------|-------------------------------------|-----------------------------------------------------------|-----------------------------------------------------------|
| Number of infected cases in parts of Japan (sentinel surveillance) [number of patients per sentinel medical institution]   | 13.91 persons                       | 15.91 persons (comparison to Period 1: 1.14 times)        | -                                                         |
| Number of infected cases in parts of Sapporo (sentinel surveillance) [number of patients per sentinel medical institution] | 10.09 persons                       | 10.36 persons (comparison to Period 1: 1.03 times)        | -                                                         |
| Number of infection in the entire city of Sapporo (estimation from wastewater surveillance)                                | 2950 persons per day                | 2530 persons per day (comparison to Period 1: 0.86 times) | 2940 persons per day (comparison to Period 2: 1.16 times) |

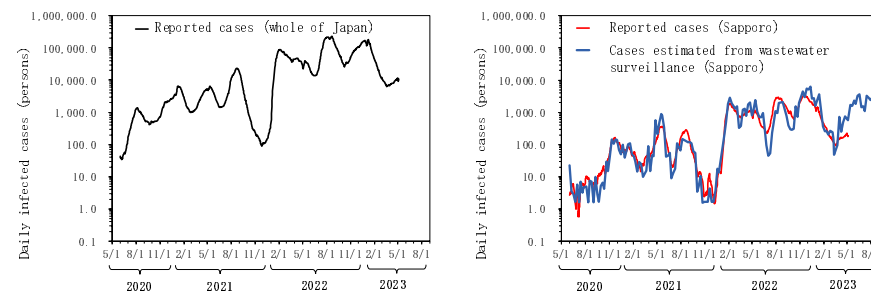

Figure. Trends in the infected cases (Left: whole of Japan; Right: Sapporo).

Figure 1. Information provided to participants. A) absence of wastewater surveillance information (control group); b) presence of wastewater surveillance information (intervention group).

Table 1. Participants' characteristics. N: number of participants; SD: standard deviation.

|                                                                                   |                                                       | N (%) or mean (SD) |              | $\phi$ , Cramer's V, or $r$ | $P$   |
|-----------------------------------------------------------------------------------|-------------------------------------------------------|--------------------|--------------|-----------------------------|-------|
|                                                                                   |                                                       | Control            | Intervention |                             |       |
| Gender                                                                            | Woman                                                 | 276 (27.6%)        | 269 (26.9%)  | 0.033                       | 0.571 |
|                                                                                   | Man                                                   | 717 (71.7%)        | 719 (71.9%)  |                             |       |
|                                                                                   | Other                                                 | 1 (0.1%)           | 4 (0.4%)     |                             |       |
|                                                                                   | Don't answer                                          | 6 (0.6%)           | 8 (0.8%)     |                             |       |
| Age                                                                               | 18–29                                                 | 38 (3.8%)          | 30 (3.0%)    | 0.061                       | 0.396 |
|                                                                                   | 30–39                                                 | 116 (11.6%)        | 100 (10.0%)  |                             |       |
|                                                                                   | 40–49                                                 | 265 (26.5%)        | 294 (29.4%)  |                             |       |
|                                                                                   | 50–59                                                 | 331 (33.1%)        | 348 (34.8%)  |                             |       |
|                                                                                   | 60–69                                                 | 167 (16.7%)        | 166 (16.6%)  |                             |       |
|                                                                                   | 70–79                                                 | 73 (7.3%)          | 53 (5.3%)    |                             |       |
|                                                                                   | 80 and more                                           | 4 (0.4%)           | 4 (0.4%)     |                             |       |
|                                                                                   | Don't answer                                          | 6 (0.6%)           | 5 (0.5%)     |                             |       |
|                                                                                   | Prefecture                                            | Hokkaido           | 39 (3.9%)    |                             |       |
| Other                                                                             |                                                       | 961 (96.1%)        | 957 (95.7%)  |                             |       |
| Covid history                                                                     | Yes                                                   | 193 (19.3%)        | 189 (18.9%)  | 0.010                       | 0.901 |
|                                                                                   | No                                                    | 803 (80.3%)        | 808 (80.8%)  |                             |       |
|                                                                                   | Don't answer                                          | 4 (0.4%)           | 3 (0.3%)     |                             |       |
| Interest in and preventive behavior against COVID-19 before providing information | Interest in COVID-19 (pre)                            | 3.51 (1.04)        | 3.52 (1.06)  | 0.010                       | 0.666 |
|                                                                                   | Interest in infection status (pre)                    | 3.25 (1.15)        | 3.32 (1.15)  | 0.028                       | 0.209 |
|                                                                                   | Overall preventive behavior (pre)                     | 3.80 (1.00)        | 3.82 (0.95)  | 0.001                       | 0.968 |
|                                                                                   | Mask-wearing (pre)                                    | 3.69 (1.32)        | 3.66 (1.34)  | -0.011                      | 0.616 |
|                                                                                   | Awareness of the importance of COVID-19 vaccine (pre) | 3.40 (1.24)        | 3.41 (1.19)  | -0.004                      | 0.857 |

Table 2. Differences in understanding of, interest in, relief regarding, and intention for preventive behavior against COVID-19 after providing information. SD: standard deviation.

|                                                        | mean (SD)   |              | <i>r</i> | <i>P</i> |
|--------------------------------------------------------|-------------|--------------|----------|----------|
|                                                        | Control     | Intervention |          |          |
| Understanding of infection status (post)               | 3.79 (0.79) | 3.76 (0.77)  | -0.027   | 0.225    |
| Interest in infection status (post)                    | 3.33 (1.05) | 3.43 (1.02)  | 0.048    | 0.032    |
| Relief regarding infection status (post)               | 2.58 (0.99) | 2.67 (1.00)  | 0.045    | 0.043    |
| Intent to engage in overall preventive behavior (post) | 3.62 (1.04) | 3.71 (1.03)  | 0.048    | 0.032    |
| Intent to wear masks (post)                            | 3.51 (1.24) | 3.55 (1.25)  | 0.021    | 0.345    |
| Intent to receive COVID-19 vaccine (post)              | 3.09 (1.29) | 3.11 (1.28)  | 0.006    | 0.783    |

Table 3. Associations of intervention, interest (pre), overall preventive behavior (pre), and their interaction terms with interest (post), relief (post), and intent to engage in overall preventive behavior against COVID-19 (post). VIF: variance inflation factor; aOR: adjusted odds ratio; CI: confidence interval.

|                                                  | VIF  | Interest in infection status (post) | Relief regarding infection status (post) | Intent to engage in overall preventive behavior (post) |
|--------------------------------------------------|------|-------------------------------------|------------------------------------------|--------------------------------------------------------|
| Intervention                                     | 1.00 | 1.23 (1.05–1.45)                    | 1.17 (1.00–1.38)                         | 1.29 (1.08–1.53)                                       |
| Interest in COVID-19 (pre)                       | 3.40 | 2.91 (2.50–3.38)                    | 1.06 (0.92–1.22)                         | 2.03 (1.74–2.36)                                       |
| Overall preventive behavior (pre)                | 3.16 | 1.85 (1.59–2.15)                    | 0.85 (0.73–0.98)                         | 4.02 (3.41–4.74)                                       |
| Intervention * Interest in COVID-19 (pre)        | 3.29 | 0.94 (0.77–1.15)                    | 0.80 (0.66–0.97)                         | 0.83 (0.68–1.02)                                       |
| Intervention * Overall preventive behavior (pre) | 3.06 | 0.87 (0.70–1.08)                    | 1.24 (1.01–1.53)                         | 1.17 (0.94–1.46)                                       |

Table 4. Differences in proportions of keyword searches after providing information. N: number of participants.

|                | N (%)      |              | $\phi$                                     | <i>P</i>                                   |
|----------------|------------|--------------|--------------------------------------------|--------------------------------------------|
|                | Control    | Intervention |                                            |                                            |
| “Bullet train” | 21 (2.1%)  | 32 (3.2%)    | 0.034                                      | 0.129                                      |
| “Highway”      | ≤5 (≤0.5%) | 11 (1.1%)    | 0.034 <sup>a</sup><br>(0.048) <sup>b</sup> | 0.146 <sup>a</sup><br>(0.034) <sup>b</sup> |
| “Airplane”     | 47 (4.7%)  | 37 (3.7%)    | -0.025                                     | 0.273                                      |
| “COVID-19”     | 16 (1.6%)  | 17 (1.7%)    | 0.004                                      | 0.915                                      |
| “Wastewater”   | ≤5 (0.5%)  | ≤5 (0.5%)    | -                                          | -                                          |

<sup>a</sup> “5” (i.e., the upper limit) was used for the number of control group.

<sup>b</sup> “3” (i.e., 1/2 of the upper limit rounded to the nearest integer) was used for the number of control group.
