# Supplementary material for: Perceptions and responses to COVID-19 through wastewater surveillance information and online search behavior: A randomized controlled trial
Source: bioRxiv or medRxiv preprint supplement (doi:10.1101/2023.10.20.23297297), 2023-10-21
Supplement: Supplementary file [file media-1.pdf]

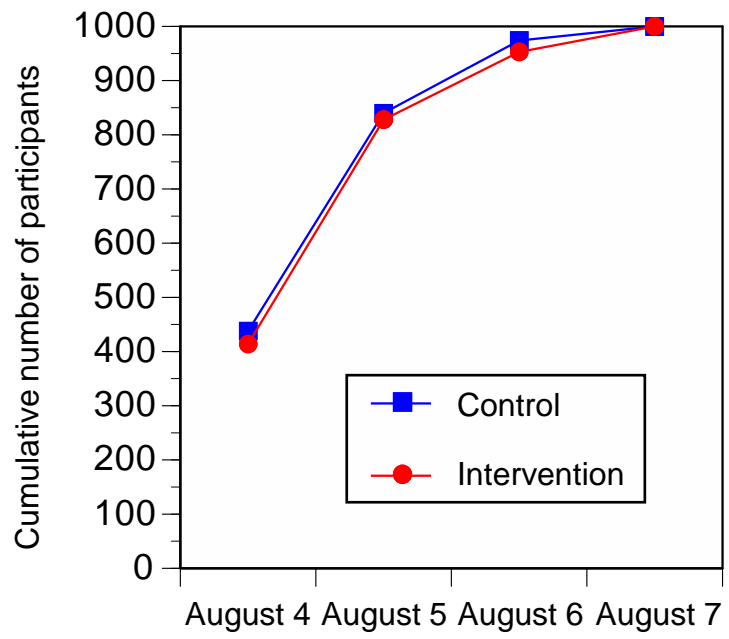

Figure S1. Cumulative number of participants.

Table S1. Spearman's correlation among understanding of, interest in, relief regarding, and intention for preventive behavior against COVID-19 after providing information.

|                          |                                                        | Upper right: control                     |                                     |                                          |                                                        |                             |                                           |
|--------------------------|--------------------------------------------------------|------------------------------------------|-------------------------------------|------------------------------------------|--------------------------------------------------------|-----------------------------|-------------------------------------------|
|                          |                                                        | Understanding of infection status (post) | Interest in infection status (post) | Relief regarding infection status (post) | Intent to engage in overall preventive behavior (post) | Intent to wear masks (post) | Intent to receive COVID-19 vaccine (post) |
| Lower left: intervention | Understanding of infection status (post)               | -                                        | 0.461**                             | 0.139**                                  | 0.339**                                                | 0.265**                     | 0.269**                                   |
|                          | Interest in infection status (post)                    | 0.523**                                  | -                                   | 0.009                                    | 0.692**                                                | 0.592**                     | 0.509**                                   |
|                          | Relief regarding infection status (post)               | 0.111**                                  | 0.044                               | -                                        | -0.056                                                 | -0.060                      | 0.030                                     |
|                          | Intent to engage in overall preventive behavior (post) | 0.404**                                  | 0.639**                             | -0.027                                   | -                                                      | 0.786**                     | 0.574**                                   |
|                          | Intent to wear masks (post)                            | 0.275**                                  | 0.581**                             | -0.057                                   | 0.784**                                                | -                           | 0.524**                                   |
|                          | Intent to receive COVID-19 vaccine (post)              | 0.295**                                  | 0.500**                             | 0.076*                                   | 0.502**                                                | 0.491**                     | -                                         |

\*\*  $P < 0.01$ , \*  $P < 0.05$

Table S2. Differences in proportions of keyword searches before providing information. N: number of participants.

|                | N (%)      |              | $\phi$ | <i>P</i> |
|----------------|------------|--------------|--------|----------|
|                | Control    | Intervention |        |          |
| “Bullet train” | 15 (1.5%)  | 15 (1.5%)    | 0.000  | 1.000    |
| “Highway”      | ≤5 (≤0.5%) | ≤5 (≤0.5%)   | -      |          |
| “Airplane”     | 37 (3.7%)  | 29 (2.9%)    | -0.022 | 0.345    |
| “COVID-19”     | 18 (1.8%)  | 18 (1.8%)    | 0.000  | 1.000    |
| “Wastewater”   | ≤5 (0.5%)  | ≤5 (0.5%)    | -      | -        |
